# Supplementary material for: Synaptic signatures and disease vulnerabilities of layer 5 pyramidal neurons
Source: PubMed Central journal article supplement — Nat Commun. 2025 Jan 2;16:228. doi: 10.1038/s41467-024-55470-w (PMC11697078; doi:10.1038/s41467-024-55470-w), 2025-01-02
Supplement: 41467_2024_55470_MOESM2_ESM.pdf [file 41467_2024_55470_MOESM2_ESM.pdf]

## Description of Additional Supplementary Files

**Supplementary Data 1:** Statistics and database analysis of proteomic data referring to experiment in Figure 2.

**Supplementary Data 2:** Statistics and database analysis of proteomic data referring to experiment in Figure 3, 4 and 5.
